# Supplementary material for: Influences of the protonic state of an imidazole-phenanthroline ligand on the luminescence properties of copper(i) complexes: experimental and theoretical research
Source: Royal Society of Chemistry journal article supplement (doi:10.1039/c5nj02100f), 2015-11-11

## Supporting information

# Influence of the Protonic State of an Imidazole-Phenanthroline Ligand on the Luminescence Properties of Copper(I) Complexes: Experimental and Theoretical Research

Xinfang Liu,<sup>\*a</sup> Rongfang Li,<sup>a</sup> Lufang Ma,<sup>a</sup> Xun Feng<sup>a</sup> and Yuqiang Ding<sup>b</sup>

**Table S1.** Selected Mulliken and NBO charges of **2a** and **2b**

| Atom | Complex <b>2a</b> |        | Complex <b>2b pph3</b> |        |
|------|-------------------|--------|------------------------|--------|
|      | Mulliken          | NBO    | Mulliken               | NBO    |
| Cu   | -0.121            | 0.247  | -0.182                 | 0.350  |
| P1   | 0.564             | 0.971  | 0.554                  | 0.948  |
| P2   | 0.541             | 0.972  | 0.537                  | 0.949  |
| N1   | -0.482            | -0.538 | -0.477                 | -0.523 |
| N2   | -0.488            | -0.538 | -0.478                 | -0.516 |

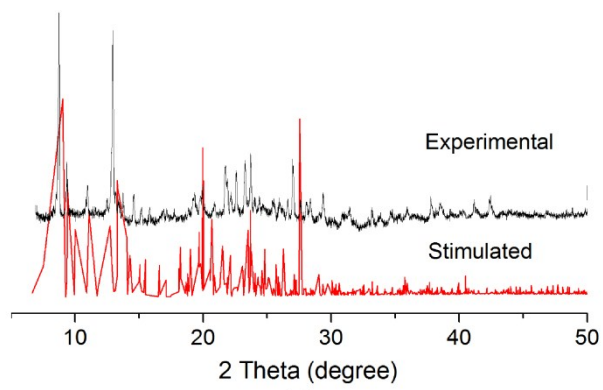

(a)

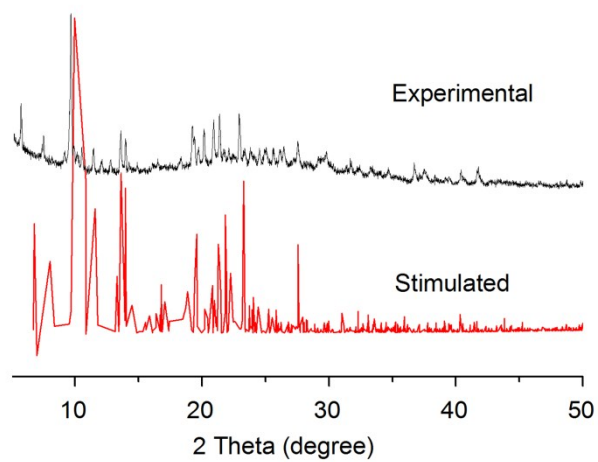

(b)

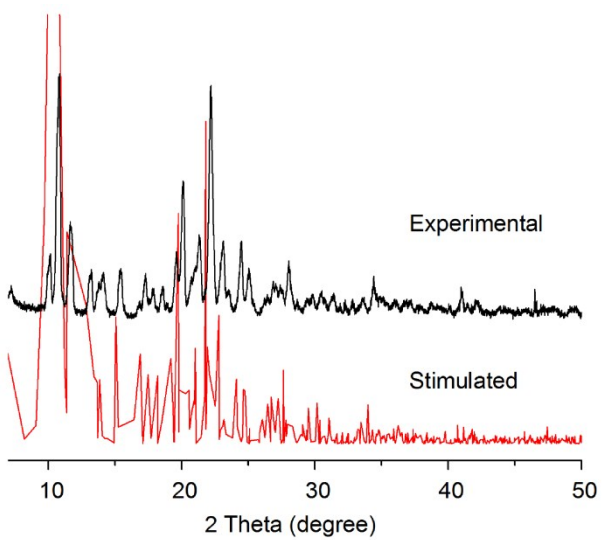

(c)

Figure S1. Comparing the X-ray powder diffraction patterns of microcrystalline powders and stimulated for **1b** (a); **2a** (b); **2b** (c).

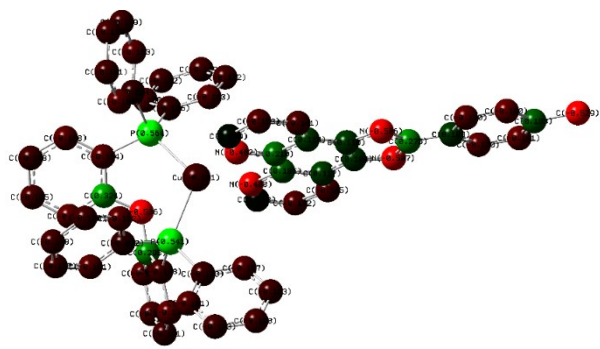

2a

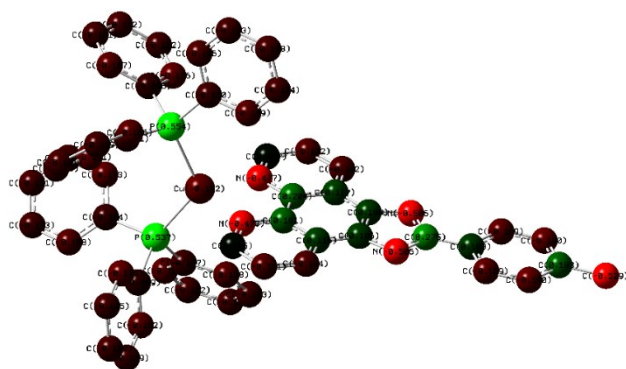

2b

Figure S2. Mulliken atom charges of complexes 2a and 2b

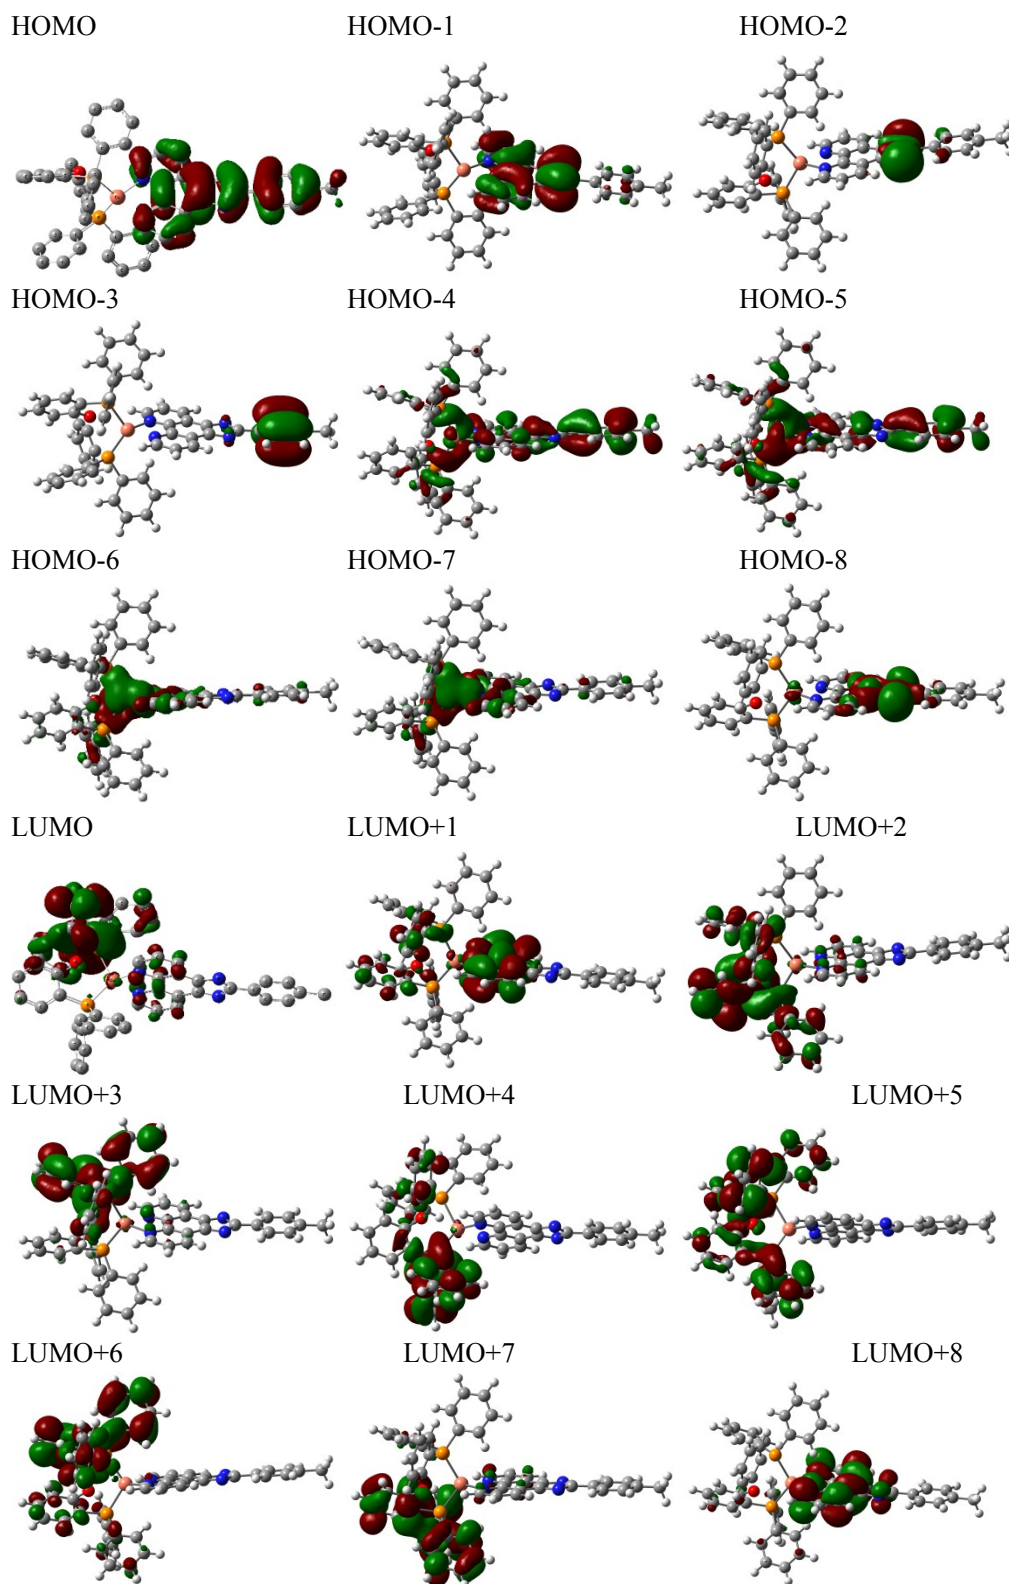

Figure S3. Frontier orbital of complex **2a**

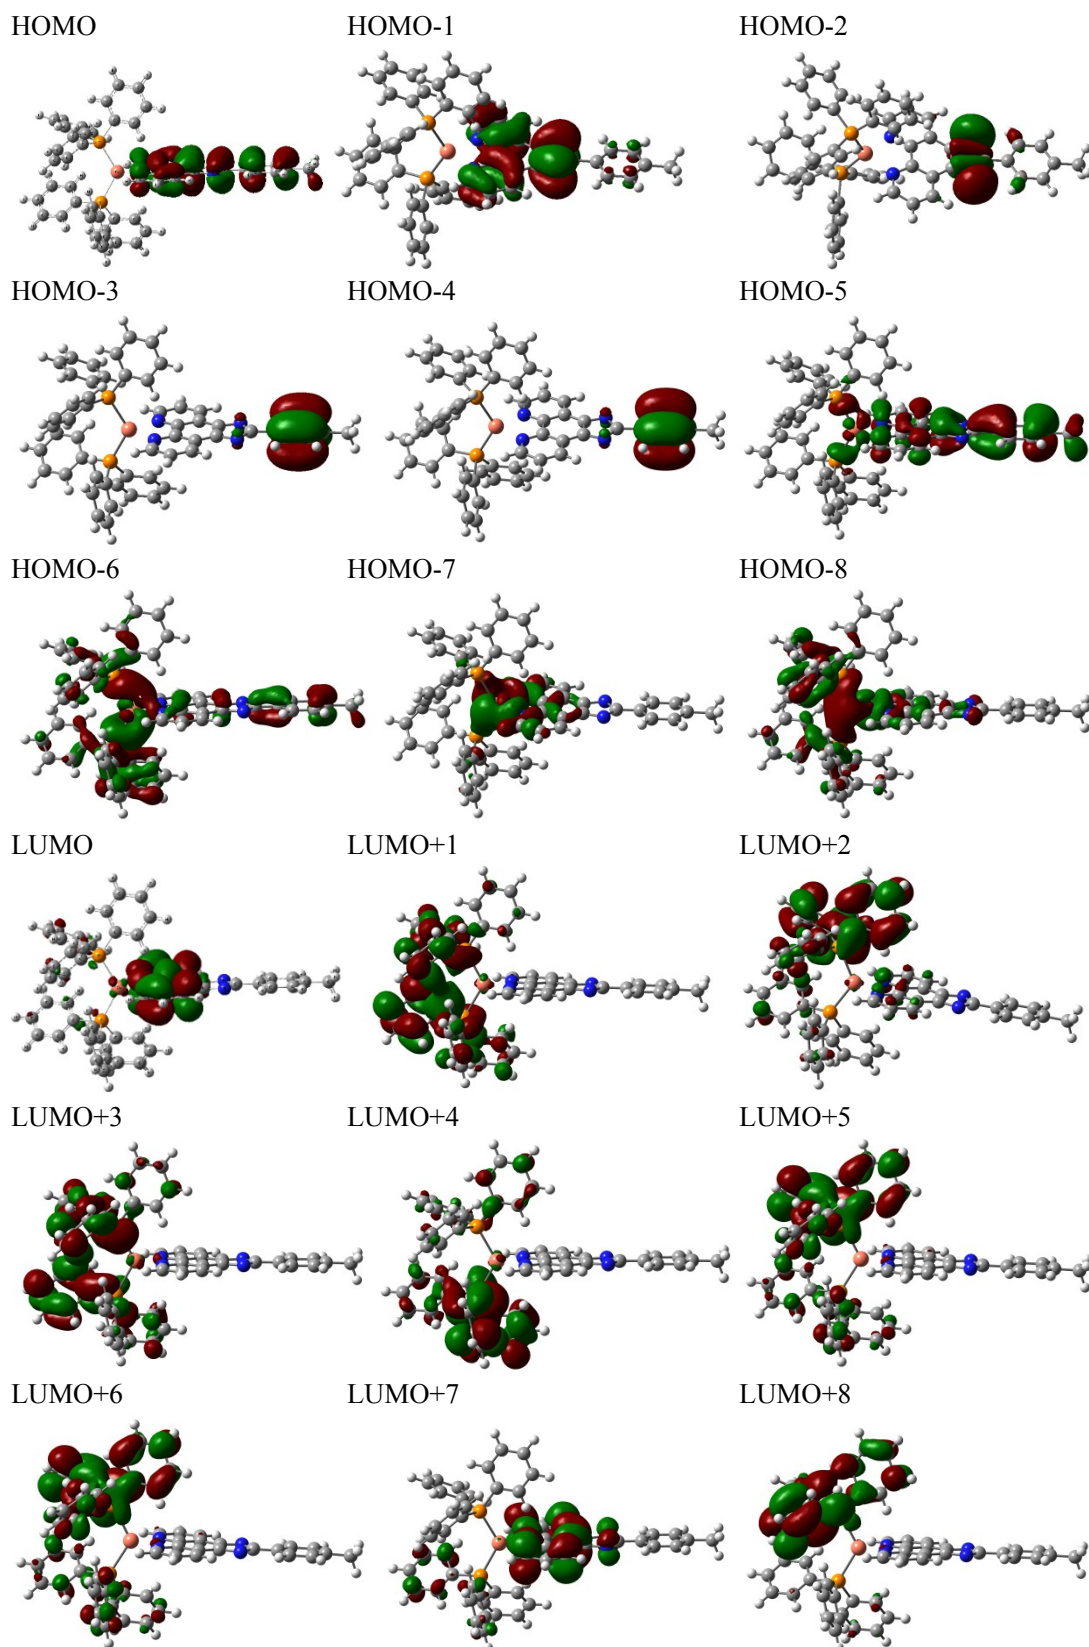

Figure S4. Frontier orbital of complex **2b**

Figure S5.  $^1\text{H}$  NMR of complex **1a**

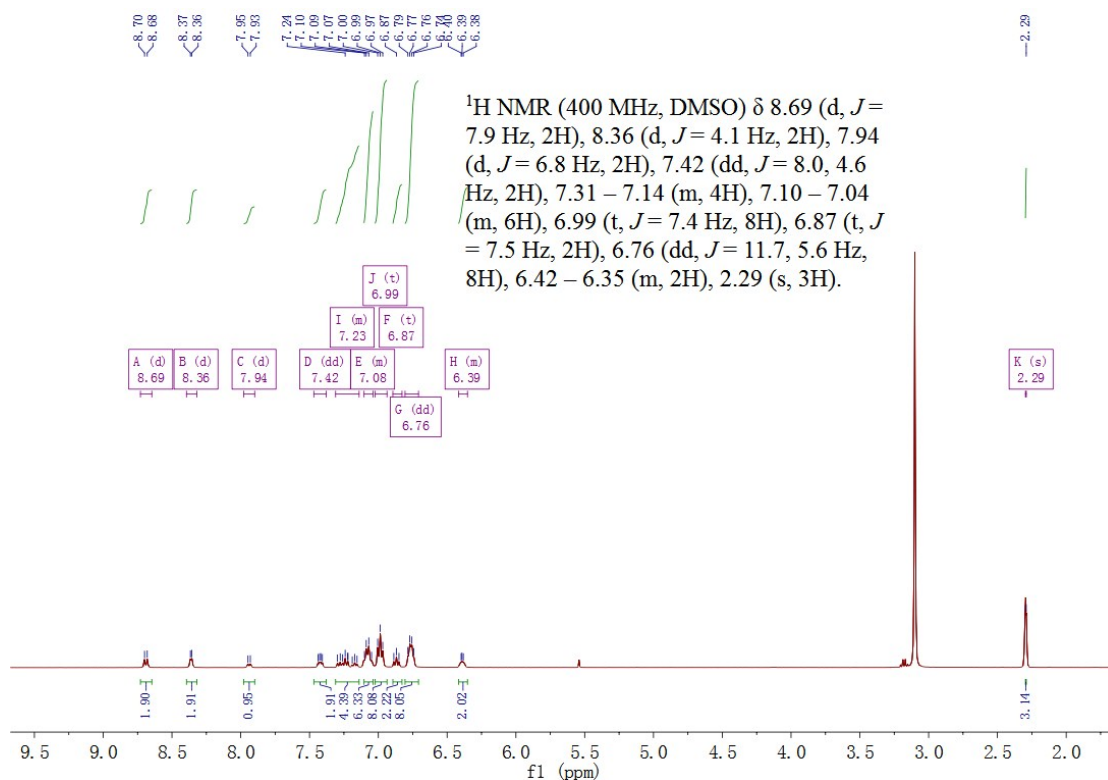

Figure S6.  $^1\text{H}$  NMR of complex **1b**

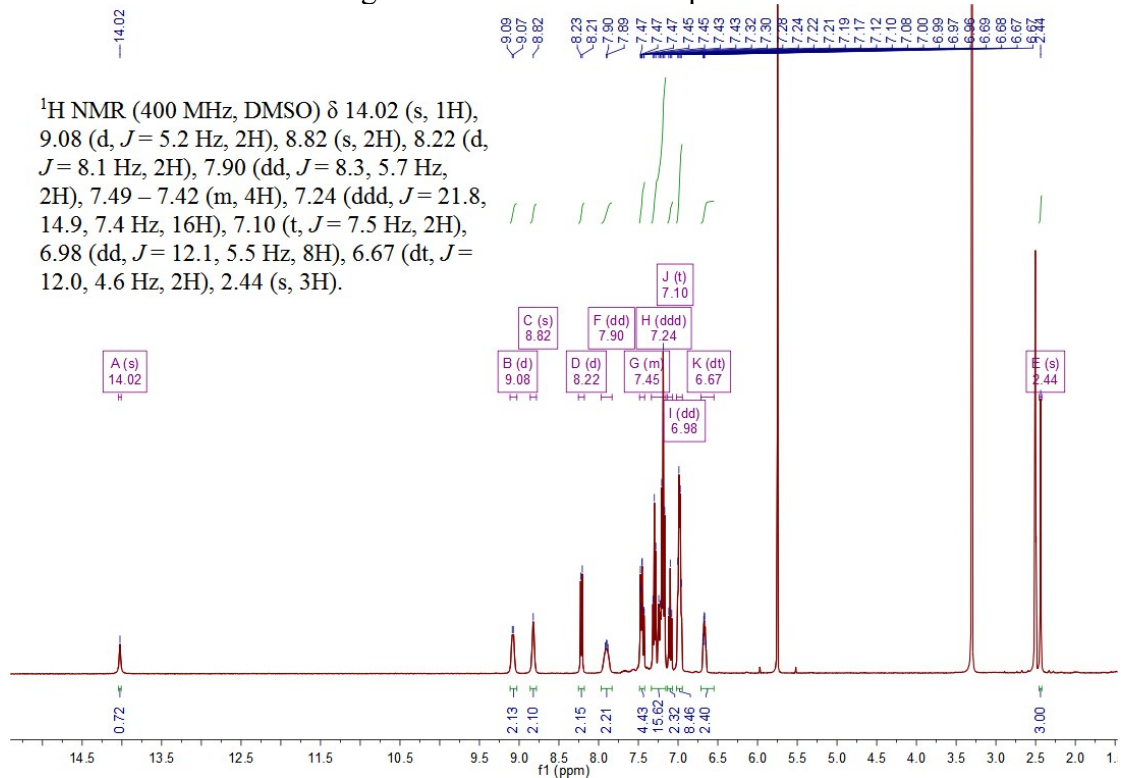

Figure S7.  $^1\text{H}$  NMR of complex **2a**

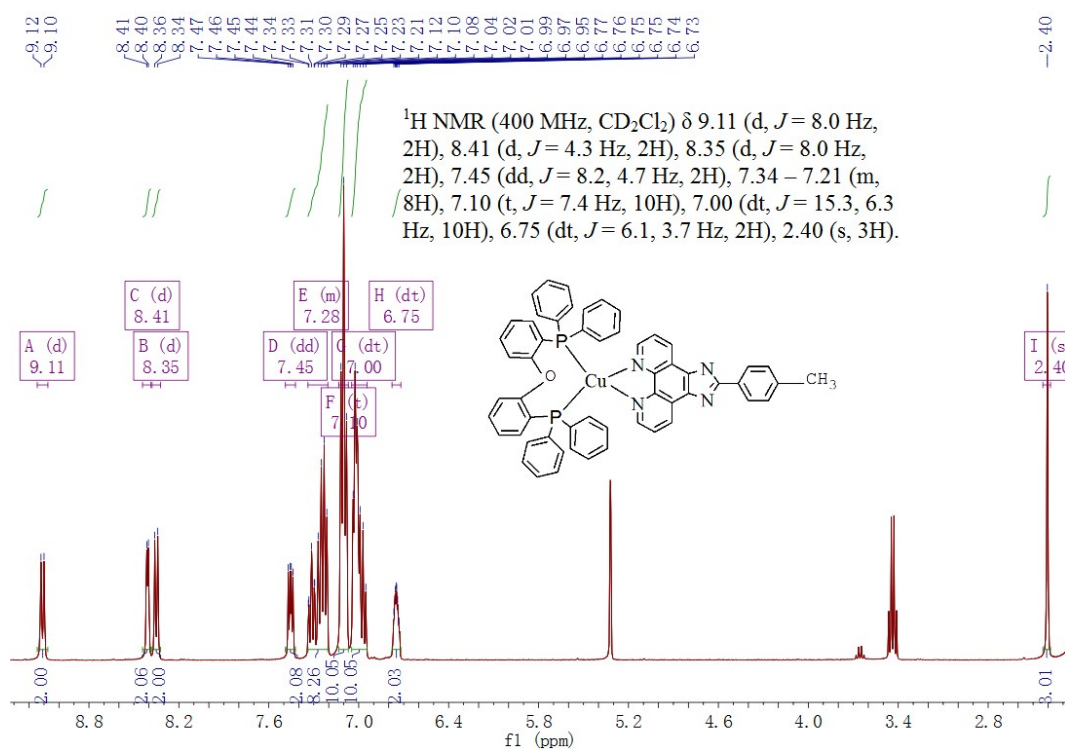

Figure S8.  $^1\text{H}$  NMR of complex **2b**

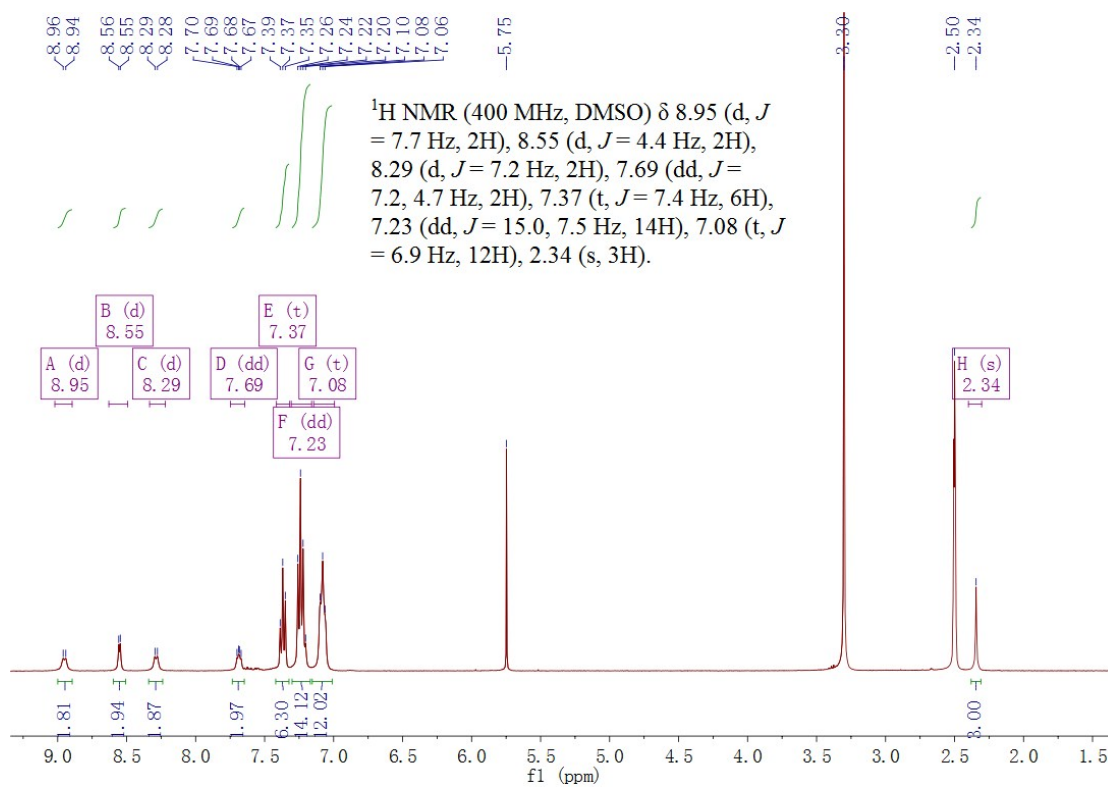

Supplement: c5nj02100f1.pdf [file c5nj02100f1.pdf]
